# Supplementary material
Source: publisher figshare collection journal article supplement (https://springernature.figshare.com/ndownloader/files/13122800)
Supplement: Supplementary file 1 [file 13122800]

**Table S1** Effect of uridine’s feed concentration on cell growth and mAb production

| Uridine feed concentration | Peak VCD  (×106 cells/mL) | *IVCC*  (109cells·day/L) | Mab concentration(g/L) | qmAb  [mg/(109cells·day)] |
| --- | --- | --- | --- | --- |
| Control | 12.13 | 98.98 | 2.25 | 22.72 |
| 0.6 mM | 12.13 | 126.42 | 2.65 | 20.95 |
| 6 mM | 15.90** | 148.64 ** | 3.69 ** | 24.81 |
| 30 mM | 14.90** | 127.22** | 3.62** | 28.51 |

a *IVCC*, integral of viable cell concentration with time

b *qmAb*, specific mAb production

**p*<0.05 relative to control; ***p*<0.01 relative to control

**Table S2** Effect of uridine’s feed time on cell growth and mAb production

| Uridine feed  time | Peak VCD  (×106 cells/mL) | *IVCC*  (109cells·day/L) | Mab concentration(g/L) | qmAb  [mg/(109cells·day)] |
| --- | --- | --- | --- | --- |
| Control | 12.13 | 98.98 | 2.25 | 22.72 |
| Day 1-13 | 15.90** | 148.64 ** | 3.69 ** | 24.81 |
| Day 1-6 | 15.93** | 153.94** | 3.27** | 21.28 |
| Day 7-12 | 11.60 | 95.68 | 2.81 | 29.40 |

a *IVCC*, integral of viable cell concentration with time

b *qmAb*, specific mAb production

**p*<0.05 relative to control; ***p*<0.01 relative to control
